# Supplementary material
Source: publisher site journal article supplement (https://www.dovepress.com/article/327404)
Supplement: Supplementary file 1 [file get_supplementary_file.php]

Supplementary Table S1. Measurement and data resource for SMA-level variables

| Variable | Definition | Measurement | Source | Year |
| --- | --- | --- | --- | --- |
| Population density | The number of people living in an SMA area per square kilometer | Continuous | Statistics Bureau of Japan  Japan Population Census Survey | 2015 |
| Percentage aged more than 75 | Percentage of people who aged over 75 | Continuous | Statistics Bureau of Japan  Japan Population Census Survey | 2015 |
| Psychiatrist density | Psychiatrist per 100,000 population | Continuous | Ministry of Health, Labor and Welfare, Japan  Office of Health Statistics | 2014 |
| Cardiologist density | Cardiologist per 100,000 population | Continuous | Ministry of Health, Labor and Welfare, Japan  Office of Health Statistics | 2014 |
| Dementia rate | Incidence rate of dementia aged 75 and over | Continuous | Wide-area Association of Latter-stage Elderly Healthcare of Fukuoka Prefecture, Japan | 2014 |
| MI rate | Incidence rate of myocardial infarction aged 75 and over | Continuous | Wide-area Association of Latter-stage Elderly Healthcare of Fukuoka Prefecture, Japan | 2014 |
| Psychiatric bed density | Number of psychiatric beds per 100,000 population | Continuous | Japan Medical Association  Japan Medical Analysis Platform | 2015 |
| General bed density | Number of general beds per 100,000 population | Continuous | Japan Medical Association Japan  Medical Analysis Platform | 2015 |
| Medical chronic care bed density | Number of medical chronic care beds per 100,000 population | Continuous | Japan Medical Association  Japan Medical Analysis Platform | 2015 |
| Bed density in general clinics | Number of beds in general clinics per 100,000 population | Continuous | Japan Medical Association  Japan Medical Analysis Platform | 2015 |
| Home-visit care hospital density | Number of home-visit care hospitals per 100,000 population | Continuous | Japan Medical Association  Japan Medical Analysis Platform | 2015 |
| Home-visit care clinic density | Number of home-visit care clinics per 100,000 population | Continuous | Japan Medical Association  Japan Medical Analysis Platform | 2015 |
| Long-term care facility density | Number of nursing homes facilities per 1,000 people aged 75 and over | Continuous | Japan Medical Association  Japan Medical Analysis Platform | 2015 |
| Long-term care staff density | Number of nursing home staff per 1,000 people aged 75 and over | Continuous | Japan Medical Association  Japan Medical Analysis Platform | 2015 |

Supplementary Table S2. Baseline characteristics of patients by sex

| Characteristic | Men | Women | *P* Value |
| --- | --- | --- | --- |
| Age category (%) |  |  |  |
| 65−74 | 201 (3.83) | 105 (1.26) | <0.001 |
| 75−84 | 2,478 (47.24) | 2,686 (32.18) |
| 85−94 | 2,301 (43.86) | 4,600 (55.11) |
| ≥95 | 266 (5.07) | 956 (11.45) |
| Type of AMI (%) |  |  |  |
| STEMI | 767 (14.62) | 1,033 (12.38) | <0.001 |
| Non-STEMI | 4,479 (85.38) | 7,314 (87.62) |
| Invasive management (%) | 951 (18.13) | 1,003 (12.02) | <0.001 |
| Type of dementia disorder (%) |  |  |  |
| Alzheimer disease | 3,060 (58.33) | 5,248 (62.87) | <0.001 |
| Vascular dementia | 297 (5.66) | 331 (3.97) |
| Mixed dementia | 330 (6.29) | 378 (4.53) |
| Other dementias | 1,559 (29.72) | 2,390 (28.63) |
| DPC (%) | 1,608 (30.65) | 2,236 (26.79) | <0.001 |
| Comorbidity score, median (IQR) | 3 (2) | 3 (2) | <0.001 |
| Drugs (%) |  |  |  |
| Antithrombotic | 3,913 (74.59) | 5,512 (66.04) | <0.001 |
| Statins | 2,276 (43.39) | 3,845 (46.06) | 0.002 |
| Beta blocks | 1,353 (25.79) | 2,157 (25.84) | 0.948 |
| Calcium channel blockers | 2,876 (54.82) | 4,757 (56.99) | 0.013 |
| ACE-I/ARB | 1,821 (34.71) | 2,701 (32.36) | 0.005 |
| Vasodilators | 4,403 (83.93) | 7,173 (85.94) | 0.001 |
| Diuretics | 3,575 (68.15) | 6,062 (72.62) | <0.001 |
| Antidiabetic | 1,493 (28.46) | 1,767 (21.17) | <0.001 |
| Lipid-lowering drugs | 2,383 (45.43) | 4,020 (48.16) | 0.002 |
| Cholinesterase inhibitors | 1,170 (22.30) | 1,486 (17.80) | <0.001 |
| Antipsychotic | 4,121 (78.56) | 6,317 (75.68) | <0.001 |
| Anxiolytics | 4,919 (93.77) | 7,709 (92.36) | 0.002 |
| Hypnotics and sedatives | 4,557 (86.87) | 7,119 (85.29) | 0.010 |
| Total number of drugs, median (IQR) | 7 (3) | 7 (3) | 0.089 |
| Home medical care (%) | 2,602 (49.60) | 4,358 (52.21) | 0.003 |
| Type of long-term care (%) |  |  |  |
| No Long-term care | 980 (18.68) | 763 (9.14) | <0.001 |
| Home-visit care | 2,207 (42.07) | 3,067 (36.74) |
| Residential facility care | 1,329 (25.33) | 3,088 (37.00) |
| Outpatient facility care | 730 (13.92) | 1,429 (17.12) |

**Abbreviations**: AMI, acute myocardial infarction; STEMI, ST-elevation myocardial infarction; ACE-I, angiotensin-converting enzyme inhibitor; ARB, angiotensin receptor blocker; DPC, Diagnosis Procedure Combination.

Supplementary Table S3. Baseline characteristics of patients by the type of AMI

| Characteristic | STEMI | Non-STEMI | *P* Value |
| --- | --- | --- | --- |
| Age category (%) |  |  |  |
| 65−74 | 27 (1.50) | 279 (2.37) | 0.002 |
| 75−84 | 737 (40.94) | 4,427 (37.54) |
| 85−94 | 898 (49.89) | 6,003 (50.90) |
| ≥95 | 138 (7.67) | 1,084 (9.19) |
| Sex (%) |  |  |  |
| Men | 767 (42.61) | 4,479 (37.98) | <0.001 |
| Women | 1,033 (57.39) | 7,314 (62.02) |
| Invasive management (%) | 1,182 (65.67) | 772 (6.55) | <0.001 |
| Type of dementia disorder (%) |  |  |  |
| Alzheimer disease | 1,069 (59.39) | 7,239 (61.38) |  |
| Vascular dementia | 89 (4.94) | 539 (4.57) |
| Mixed dementia | 97 (5.39) | 611 (5.18) |
| Other dementias | 545 (30.28) | 3,404 (28.86) |
| DPC (%) | 1,561 (86.72) | 2,283 (19.36) | <0.001 |
| Comorbidity score, median (IQR) | 3 (2) | 3 (2) | <0.001 |
| Drugs (%) |  |  |  |
| Antithrombotic | 1,684 (93.56) | 7,741 (65.64) | <0.001 |
| Statins | 1,357 (75.39) | 4,764 (40.40) | <0.001 |
| Beta blocks | 673 (37.39) | 2,837 (24.06) | <0.001 |
| Calcium channel blockers | 1,080 (60.00) | 6,553 (55.57) | <0.001 |
| ACE-I/ARB | 1,043 (57.94) | 3,479 (29.50) | <0.001 |
| Vasodilators | 1,742 (96.78) | 9,834 (83.39) | <0.001 |
| Diuretics | 1,414 (78.56) | 8,223 (69.73) | <0.001 |
| Antidiabetic | 546 (30.33) | 2,714 (23.01) | <0.001 |
| Lipid-lowering drugs | 1,381 (76.72) | 5,022 (42.58) | <0.001 |
| Cholinesterase inhibitors | 329 (18.28) | 2,327 (19.73) | 0.147 |
| Antipsychotic | 1,470 (81.67) | 8,968 (76.05) | <0.001 |
| Anxiolytics | 1,690 (93.89) | 10,938 (92.75) | 0.080 |
| Hypnotics and sedatives | 1,591 (88.39) | 10,085 (85.52) | 0.001 |
| Total number of drugs, median (IQR) | 9 (2) | 7 (4) | <0.001 |
| Home-visit treatment (%) | 915 (50.83) | 6,045 (51.26) | 0.736 |
| Type of long-term care (%) |  |  |  |
| No Long-term care | 283 (15.72) | 1,460 (12.38) | <0.001 |
| Home-visit care | 725 (40.28) | 4,549 (38.57) |
| Residential facility care | 480 (26.67) | 3,937 (33.38) |
| Outpatient facility care | 312 (17.33) | 1,847 (15.66) |

**Abbreviations**: AMI, acute myocardial infarction; STEMI, ST-elevation myocardial infarction; ACE-I, angiotensin-converting enzyme inhibitor; ARB, angiotensin receptor blocker; DPC, Diagnosis Procedure Combination.

Supplementary Table S4. Baseline characteristics of patients by invasive management

| Characteristic | Invasive management | No invasive management | *P* Value |
| --- | --- | --- | --- |
| Age category (%) |  |  |  |
| 65−74 | 57 (2.92) | 249 (2.14) | <0.001 |
| 75−84 | 923 (47.24) | 4,241 (36.44) |
| 85−94 | 899 (46.01) | 6,002 (51.57) |
| ≥95 | 75 (3.84) | 1,147 (9.85) |
| Sex (%) |  |  |  |
| Men | 951 (48.67) | 4,295 (36.90) | <0.001 |
| Women | 1,003 (51.33) | 7,344 (63.10) |
| Type of AMI (%) |  |  |  |
| STEMI | 1,182 (60.49) | 618 (5.31) | <0.001 |
| Non-STEMI | 772 (39.51) | 11,021 (94.69) |
| Type of dementia disorder (%) |  |  |  |
| Alzheimer disease | 1,164 (59.57) | 7,144 (61.38) | 0.506 |
| Vascular dementia | 93 (4.76) | 535 (4.60) |
| Mixed dementia | 107 (5.48) | 601 (5.16) |
| Other dementias | 590 (30.19) | 3,359 (28.86) |
| DPC (%) | 1,482 (75.84) | 2,362 (20.29) | <0.001 |
| Comorbidity score, median (IQR) | 4 (2) | 3 (2) | <0.001 |
| Drugs (%) |  |  |  |
| Antithrombotic | 1,945 (99.54) | 7,480 (64.27) | <0.001 |
| Statins | 1,654 (84.65) | 4,467 (38.38) | <0.001 |
| Beta blocks | 855 (43.76) | 2,655 (22.81) | <0.001 |
| Calcium channel blockers | 1,303 (66.68) | 6,330 (54.39) | <0.001 |
| ACE-I/ARB | 1,103 (56.45) | 3,419 (29.38) | <0.001 |
| Vasodilators | 1,950 (99.80) | 9,626 (82.70) | <0.001 |
| Diuretics | 1,503 (76.92) | 8,134 (69.89) | <0.001 |
| Antidiabetic | 723 (37.00) | 2,537 (21.80) | <0.001 |
| Lipid-lowering drugs | 1,678 (85.88) | 4,725 (40.60) | <0.001 |
| Cholinesterase inhibitors | 350 (17.91) | 2,306 (19.81) | 0.050 |
| Antipsychotic | 1,656 (84.75) | 8,782 (75.45) | <0.001 |
| Anxiolytics | 1,871 (95.75) | 10,757 (92.42) | <0.001 |
| Hypnotics and sedatives | 1,787 (91.45) | 9,889 (84.96) | <0.001 |
| Total number of drugs, median (IQR) | 10 (3) | 7 (4) | <0.001 |
| Home medical care (%) | 981 (50.20) | 5,979 (51.37) | 0.340 |
| Type of long-term care (%) |  |  |  |
| No Long-term care | 339 (17.35) | 1,404 (12.06) | <0.001 |
| Home-visit care | 842 (43.09) | 4,432 (38.08) |
| Residential facility care | 434 (22.21) | 3,983 (34.22) |
| Outpatient facility care | 339 (17.35) | 1,820 (15.64) |

**Abbreviations**: AMI, acute myocardial infarction; STEMI, ST-elevation myocardial infarction; ACE-I, angiotensin-converting enzyme inhibitor; ARB, angiotensin receptor blocker; DPC, Diagnosis Procedure Combination.

Supplementary Table S5. Baseline characteristics of patients by the type of dementia.

| Characteristic | Alzheimer disease | Vascular dementia | Mixed dementias | Other dementias | *P* Value |
| --- | --- | --- | --- | --- | --- |
| Age category (%) |  |  |  |  |  |
| 65−74 | 2,423 (29.16) | 167 (26.59) | 153 (21.61) | 1,215 (30.77) | <0.001 |
| 75−84 | 2,160 (26.00) | 191 (30.41) | 196 (27.68) | 1,029 (26.06) |
| 85−94 | 3,392 (40.83) | 245 (39.01) | 309 (43.64) | 1,549 (39.23) |
| ≥95 | 333 (4.01) | 25 (3.98) | 50 (7.06) | 156 (3.95) |
| Sex (%) |  |  |  |  |  |
| Men | 3,060 (36.83) | 297 (47.29) | 330 (46.61) | 1,559 (39.48) | <0.001 |
| Women | 5,248 (63.17) | 331 (52.71) | 378 (53.39) | 2,390 (60.52) |
| Type of AMI (%) |  |  |  |  |  |
| STEMI | 1,069 (12.87) | 89 (14.17) | 97 (13.70) | 545 (13.80) | 0.441 |
| Non-STEMI | 7,239 (87.13) | 539 (85.83) | 611 (86.30) | 3,404 (86.20) |
| Invasive management (%) | 1,164 (14.01) | 93 (14.81) | 107 (15.11) | 590 (14.94) | 0.506 |
| DPC (%) | 2,249 (27.07) | 189 (30.10) | 201 (28.39) | 1,205 (30.51) | 0.001 |
| Comorbidity score, median (IQR) | 3 (2) | 3 (2) | 3 (2) | 3 (2) | <0.001 |
| Drugs (%) |  |  |  |  |  |
| Antithrombotic | 5,727 (68.93) | 485 (77.23) | 473 (66.81) | 2,740 (69.38) | <0.001 |
| Statins | 3,769 (45.37) | 295 (46.97) | 315 (44.49) | 1,742 (44.11) | 0.429 |
| Beta blocks | 2,064 (24.84) | 171 (27.23) | 160 (22.60) | 1,115 (28.23) | <0.001 |
| Calcium channel blockers | 4,645 (55.91) | 390 (62.10) | 362 (51.13) | 2,236 (56.62) | 0.001 |
| ACE-I/ARB | 2,639 (31.76) | 239 (38.06) | 210 (29.66) | 1,434 (36.31) | <0.001 |
| Vasodilators | 7,035 (84.68) | 543 (86.46) | 585 (82.63) | 3,413 (86.43) | 0.012 |
| Diuretics | 5,766 (69.40) | 474 (75.48) | 473 (66.81) | 2,924 (74.04) | <0.001 |
| Antidiabetic | 1,909 (22.98) | 186 (29.62) | 170 (24.01) | 995 (25.20) | <0.001 |
| Lipid-lowering drugs | 3,948 (47.52) | 310 (49.36) | 335 (47.32) | 1,810 (45.83) | 0.218 |
| Cholinesterase inhibitors | 1,558 (18.75) | 123 (19.59) | 286 (40.40) | 689 (17.45) | <0.001 |
| Antipsychotic | 6,423 (77.31) | 491 (78.18) | 617 (87.15) | 2,907 (73.61) | <0.001 |
| Anxiolytics | 7,999 (96.28) | 574 (91.40) | 692 (97.74) | 3,363 (85.16) | <0.001 |
| Hypnotics and sedatives | 7,115 (85.64) | 553 (88.06) | 630 (88.98) | 3,378 (85.54) | 0.031 |
| Total number of drugs, median (IQR) | 7 (3) | 8 (4) | 8 (3) | 7 (3) | 0.007 |
| Home medical care (%) | 4,218 (50.77) | 336 (53.50) | 376 (53.11) | 2,030 (51.41) | 0.385 |
| Type of long-term care (%) |  |  |  |  |  |
| No Long-term care | 1,009 (12.14) | 70 (11.15) | 89 (12.57) | 575 (14.56) | <0.001 |
| Home-visit care | 3,285 (39.54) | 191 (30.41) | 304 (42.94) | 1,494 (37.83) |
| Residential facility care | 2,581 (31.07) | 251 (39.97) | 183 (25.85) | 1,402 (35.50) |
| Outpatient facility care | 1,433 (17.25) | 116 (18.47) | 132 (18.64) | 478 (12.10) |

**Abbreviations**: AMI, acute myocardial infarction; STEMI, ST-elevation myocardial infarction; ACE-I, angiotensin-converting enzyme inhibitor; ARB, angiotensin receptor blocker; DPC, Diagnosis Procedure Combination.

Supplementary Table S6. Baseline characteristics of patients by the type of long-term care

| Characteristic | No long-term care | Home-visit care | Residential facility care | Outpatient facility care | *P* Value |
| --- | --- | --- | --- | --- | --- |
| Age category (%) |  |  |  |  |  |
| 65−74 | 91 (5.22) | 128 (2.43) | 63 (1.43) | 24 (1.11) | <0.001 |
| 75−84 | 992 (56.91) | 2,057 (39.00) | 1,354 (30.65) | 761 (35.25) |
| 85−94 | 603 (34.60) | 2,670 (50.63) | 2,438 (55.20) | 1,190 (55.12) |
| ≥95 | 57 (3.27) | 419 (7.94) | 562 (12.72) | 184 (8.52) |
| Sex (%) |  |  |  |  |  |
| Men | 980 (56.22) | 2,207 (41.85) | 1,329 (30.09) | 730 (33.81) | <0.001 |
| Women | 763 (43.78) | 3,067 (58.15) | 3,088 (69.91) | 1,429 (66.19) |
| Type of AMI (%) |  |  |  |  |  |
| STEMI | 283 (16.24) | 725 (13.75) | 480 (10.87) | 312 (14.45) | <0.001 |
| Non-STEMI | 1,460 (83.76) | 4,549 (86.25) | 3,937 (89.13) | 1,847 (85.55) |
| Invasive management (%) | 339 (19.45) | 842 (15.97) | 434 (9.83) | 339 (14.45) | <0.001 |
| Type of dementia disorder (%) |  |  |  |  |  |
| Alzheimer disease | 1,009 (57.89) | 3,285 (62.29) | 2,581 (58.43) | 1,433 (66.37) | <0.001 |
| Vascular dementia | 70 (4.02) | 191 (3.62) | 251 (5.68) | 116 (5.37) |
| Mixed dementia | 89 (5.11) | 304 (5.76) | 183 (4.14) | 132 (6.11) |
| Other dementias | 575 (32.99) | 1,494 (28.33) | 1,402 (31.74) | 478 (22.14) |
| DPC (%) | 518 (29.72) | 1,549 (29.37) | 1,111 (25.15) | 666 (30.85) | <0.001 |
| Comorbidity score, median (IQR) | 3 (2) | 3 (2) | 3 (2) | 3 (2) | <0.001 |
| Drugs (%) |  |  |  |  |  |
| Antithrombotic | 1,139 (65.35) | 3,835 (72.72) | 2,926 (66.24) | 1,525 (70.63) | <0.001 |
| Statins | 823 (47.22) | 2,522 (47.82) | 1,739 (39.37) | 1,037 (48.03) | <0.001 |
| Beta blocks | 453 (25.99) | 1,496 (28.37) | 993 (22.48) | 568 (26.31) | <0.001 |
| Calcium channel blockers | 929 (53.30) | 3,076 (58.32) | 2,358 (53.38) | 1,270 (58.82) | <0.001 |
| ACE-I/ARB | 528 (30.19) | 1,797 (34.07) | 1,475 (33.39) | 722 (33.44) | 0.036 |
| Vasodilators | 1,429 (81.99) | 4,582 (86.88) | 3,687 (83.47) | 1,878 (86.98) | <0.001 |
| Diuretics | 1,081 (62.02) | 3,742 (70.95) | 3,247 (73.51) | 1,567 (72.58) | <0.001 |
| Antidiabetic | 466 (26.74) | 1,369 (25.96) | 915 (20.71) | 510 (23.62) | <0.001 |
| Lipid-lowering drugs | 861 (49.40) | 2,645 (50.15) | 1,819 (41.18) | 1,078 (49.93) | <0.001 |
| Cholinesterase inhibitors | 327 (18.76) | 1,080 (20.48) | 833 (18.86) | 416 (19.27) | 0.170 |
| Antipsychotic | 1,263 (72.46) | 4,105 (77.83) | 3,350 (75.84) | 1,720 (79.67) | <0.001 |
| Anxiolytics | 1,591 (91.28) | 4,962 (94.08) | 4,028 (91.19) | 2,047 (94.81) | <0.001 |
| Hypnotics and sedatives | 1,468 (84.22) | 4,592 (87.07) | 3,754 (84.99) | 1,862 (86.24) | 0.004 |
| Total number of drugs, median (IQR) | 7 (4) | 8 (3) | 7 (4) | 8 (3) | <0.001 |
| Home medical care (%) | 410 (23.52) | 2,982 (56.54) | 2,139 (48.43) | 1,429 (66.19) | <0.001 |

**Abbreviations**: AMI, acute myocardial infarction; STEMI, ST-elevation myocardial infarction; ACE-I, angiotensin-converting enzyme inhibitor; ARB, angiotensin receptor blocker; DPC, Diagnosis Procedure Combination.
